# Supplementary material for: Synergistic effect of cobalt boride nanoparticles on MoS2 nanoflowers for a highly efficient hydrogen evolution reaction in alkaline media
Source: Royal Society of Chemistry journal article supplement (doi:10.1039/c9nr10230b), 2020-01-01
Supplement: c9nr10230b1.pdf [file c9nr10230b1.pdf]

## Supporting Information

### **Synergistic Effect of Cobalt Boride Nanoparticles on MoS<sub>2</sub> Nanoflowers for Highly Efficient Hydrogen Evolution in Alkaline Media**

*Jie Lao<sup>a</sup>, Dong Li<sup>a</sup>, Chunli Jiang<sup>a,b</sup>, Chunhua Luo<sup>a,\*</sup>, Ruijuan Qi<sup>a</sup>, Hechun Lin<sup>a</sup>, Rong  
Huang<sup>a,b</sup>, Geoffrey I. N. Waterhouse<sup>c</sup> and Hui Peng<sup>a,b,\*</sup>*

<sup>a</sup> Key Laboratory of Polar Materials and Devices (MOE), Department of Electronics,  
East China Normal University, Shanghai, 200241, China.

<sup>b</sup> Collaborative Innovation Center of Extreme Optics, Shanxi University, Taiyuan,  
Shanxi 030006, China

<sup>c</sup> School of Chemical Sciences, The University of Auckland, Auckland 1142, New  
Zealand

**\* Corresponding authors at:** Key Laboratory of Polar Materials and Devices (MOE),  
Department of Electronics, East China Normal University, Shanghai, 200241, China.

Address correspondence to: [chluo@ee.ecnu.edu.cn](mailto:chluo@ee.ecnu.edu.cn), [hpeng@ee.ecnu.edu.cn](mailto:hpeng@ee.ecnu.edu.cn)

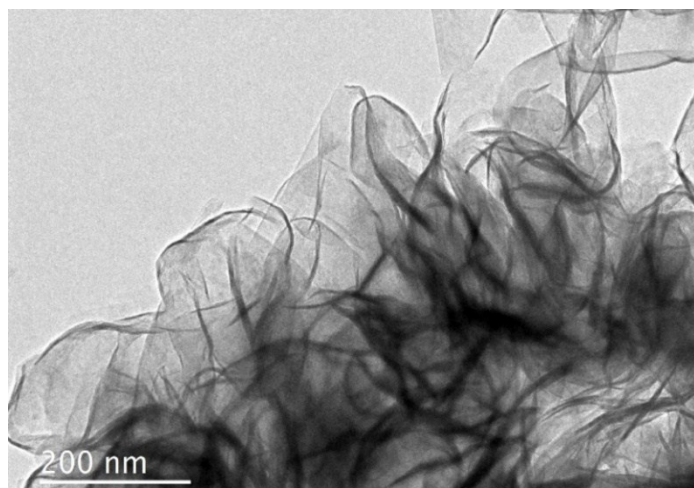

**Figure S1.** TEM image of the MoS<sub>2</sub> NFs.

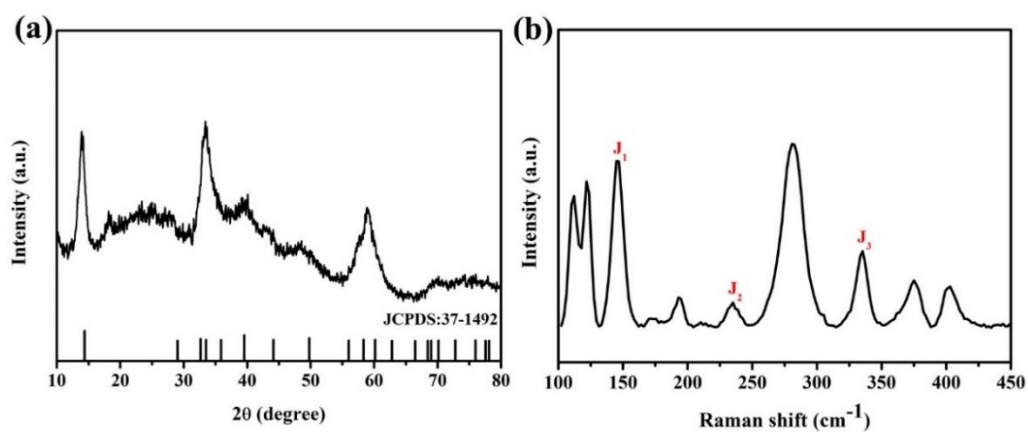

**Figure S2.** (a) XRD pattern and (b) Raman spectrum for the MoS<sub>2</sub> NFs.

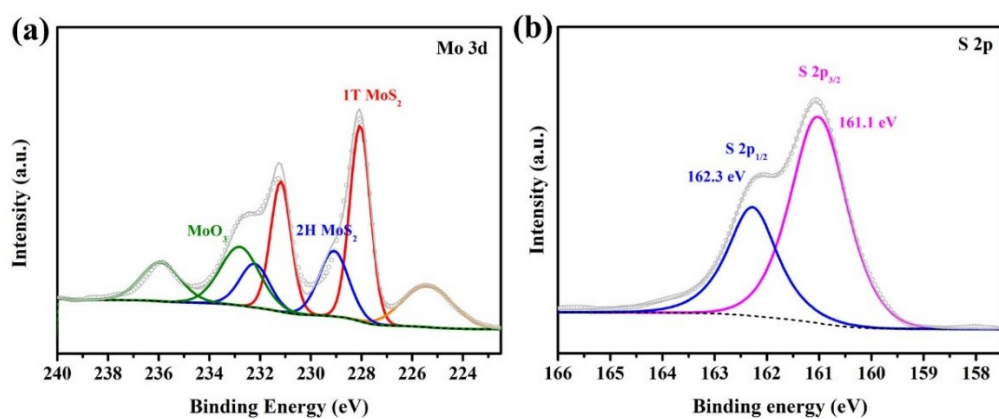

**Figure S3.** High resolution XPS spectra for the MoS<sub>2</sub> NFs: (a) Mo 3d region and (b) S 2p region.

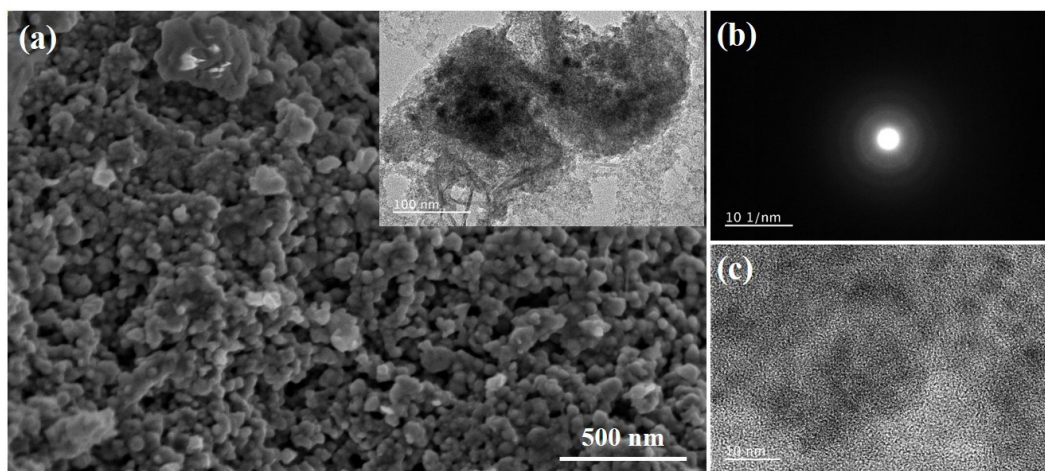

**Figure S4.** Morphological characterization of the CoB NPs. (a) SEM&TEM (inset) image, (b) SAED pattern, and (c) HRTEM image.

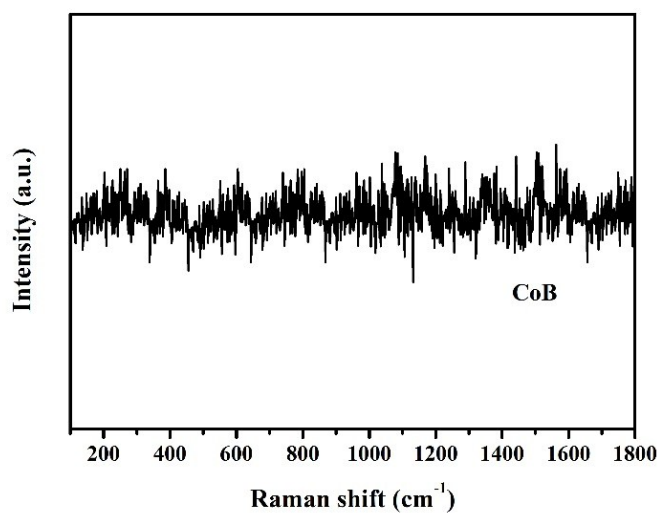

**Figure S5.** Raman spectrum of the CoB NPs.

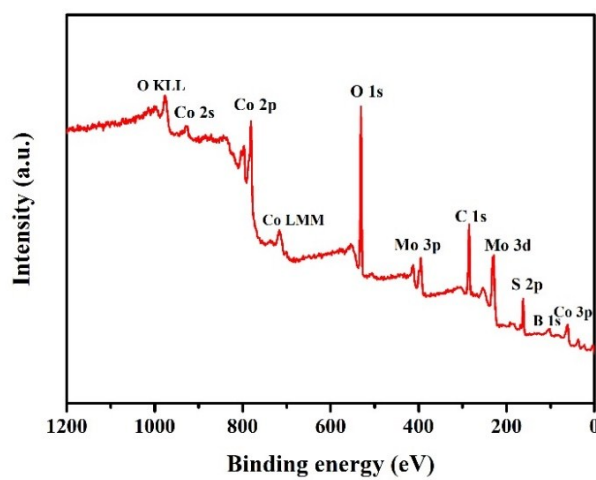

**Figure S6.** XPS survey spectrum for the CoB@MoS<sub>2</sub>-0.5-300 hybrid.

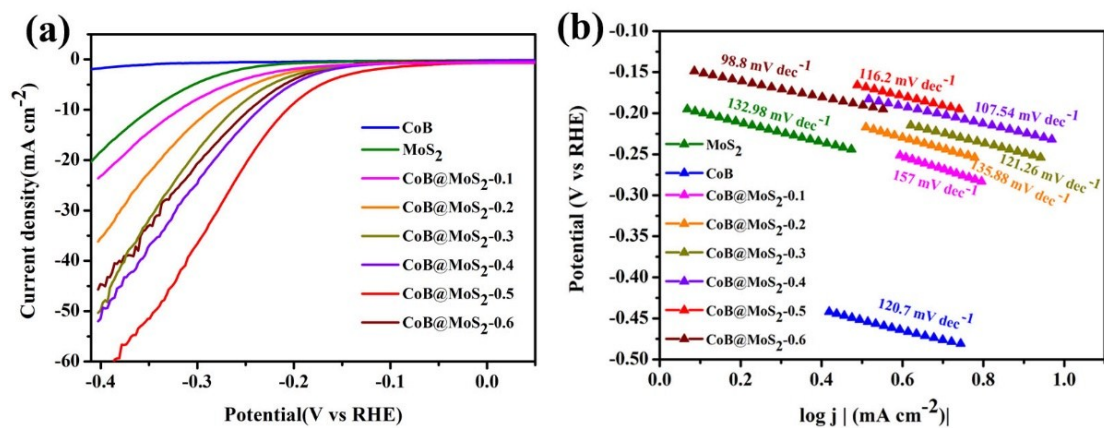

**Figure S7.** HER performance of various CoB@MoS<sub>2-x</sub> hybrids (before annealing) in 1.0 M KOH. (a) Polarization curves, and (b) Tafel plots.

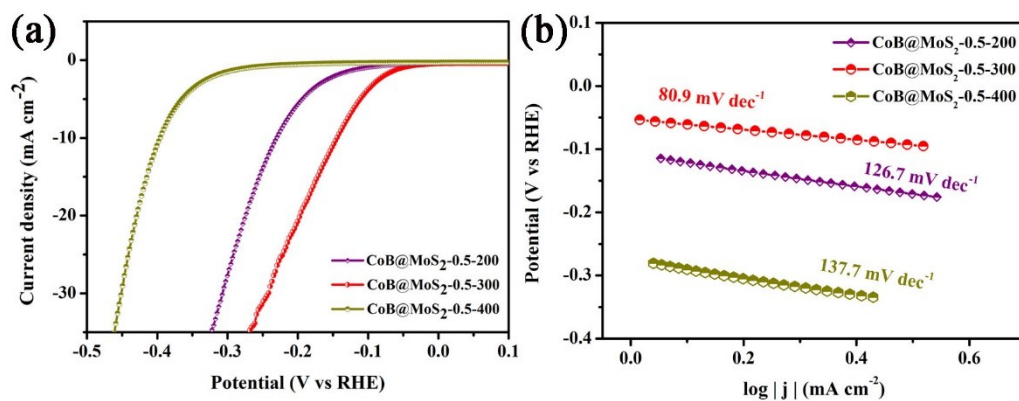

**Figure S8.** Polarization curves (a) and corresponding Tafel slopes (b) for the CoB@MoS<sub>2-x-y</sub> hybrids (after annealing at different temperatures) in 1.0 M KOH.

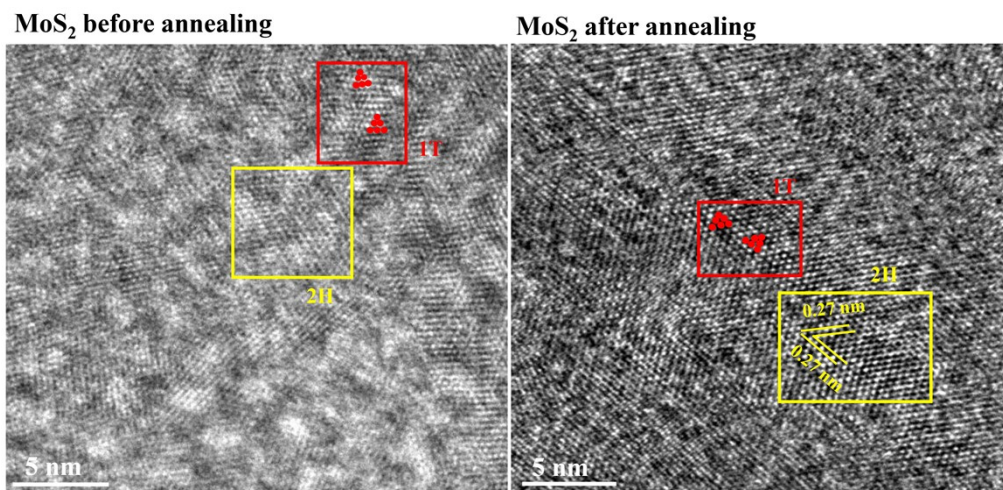

**Figure S9.** The HRTEM of MoS<sub>2</sub> before and after annealing. After the annealing, the lattice fringes became more obvious.

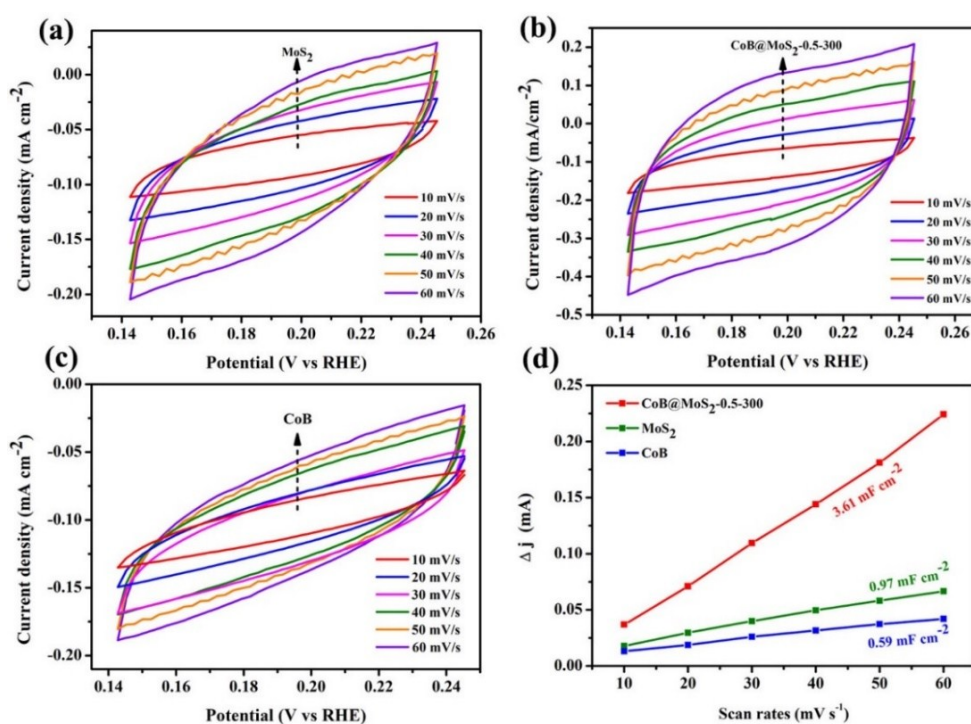

**Figure S10.** Cyclic voltammograms recorded at different scan rates in the non-Faradaic potential region (0.14-0.24 V vs. RHE) for (a) MoS<sub>2</sub>, (b) CoB@MoS<sub>2</sub>-0.5-300 and (c) CoB. (d) linear regression analyses used to estimate the double-layer area capacitances of MoS<sub>2</sub>, CoB@MoS<sub>2</sub>-0.5-300 and CoB.

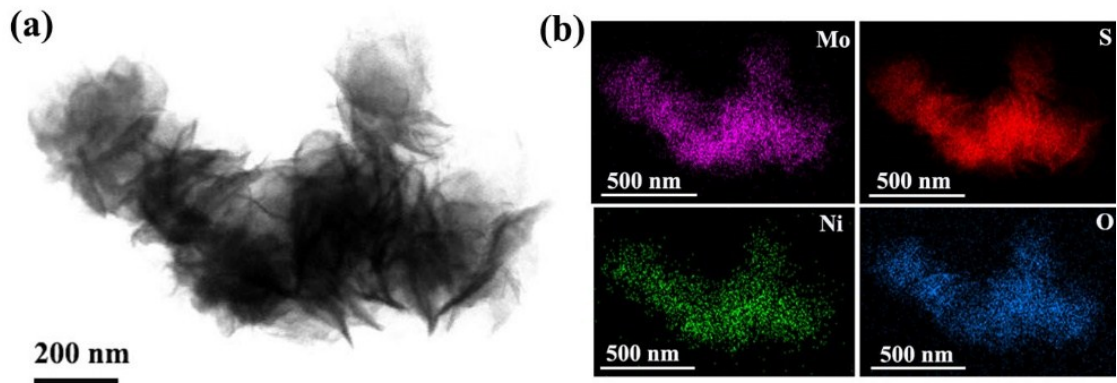

**Figure S11.** Morphological characterization of NiB@MoS<sub>2</sub>-0.5-300 NFs. (a) TEM image, and (b) EDX element mapping images.

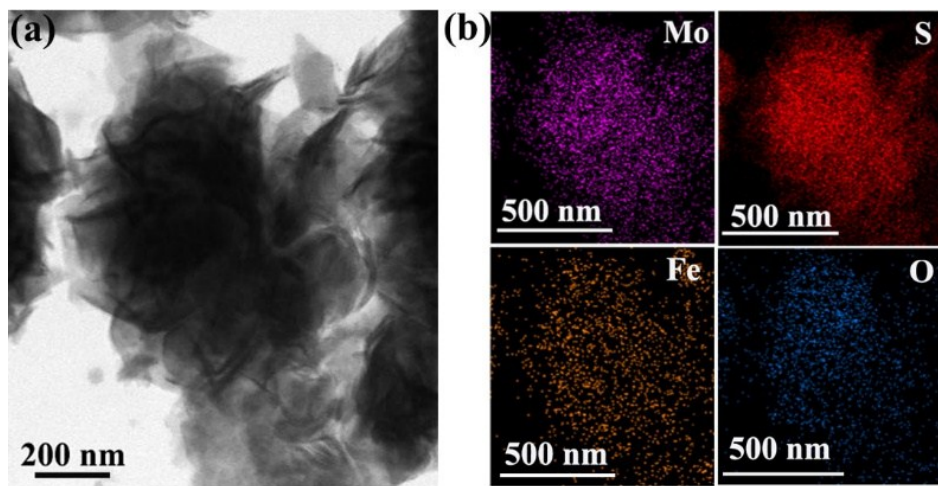

**Figure S12.** Morphological characterization of FeB@MoS<sub>2</sub>-0.5-300 NFs. (a) TEM image, and (b) EDX element mapping images.

**Table S1** HER performance of CoB@MoS<sub>2</sub>-0.5 hybrid after annealing at different temperature under N<sub>2</sub>

| Catalysis                     | Overpotential at 10 mA cm <sup>-2</sup> | Tafel Slope                |
|-------------------------------|-----------------------------------------|----------------------------|
| CoB@MoS <sub>2</sub> -0.5-200 | 232 mV                                  | 126.7 mV dec <sup>-1</sup> |
| CoB@MoS <sub>2</sub> -0.5-300 | 146 mV                                  | 80.9 mV dec <sup>-1</sup>  |
| CoB@MoS <sub>2</sub> -0.5-400 | 398 mV                                  | 137.7 mV dec <sup>-1</sup> |

**Table S2.** HER performance of different MoS<sub>2</sub>-based electrocatalysts in 1.0 M KOH

| Catalyst                                           | Overpotential<br>l<br>(10 mA cm <sup>-2</sup> ) | Tafel slope<br>(mV dec <sup>-1</sup> ) | Reference                                                   |
|----------------------------------------------------|-------------------------------------------------|----------------------------------------|-------------------------------------------------------------|
| Ni(OH) <sub>2</sub> /MoS <sub>2</sub>              | 227 mV                                          | 105                                    | <i>Nanoscale</i><br>2018, 10, 19074.                        |
| NiCo <sub>2</sub> S <sub>4</sub> @MoS <sub>2</sub> | 194 mV                                          | 68                                     | <i>New J. Chem.</i><br>2019, 43, 3601                       |
| 2D-<br>MoS <sub>2</sub> /Ni(OH) <sub>2</sub>       | 185 mV                                          | 73                                     | <i>Adv. Mater.</i><br>2018, 30, 1801171.                    |
| Co-BDC/MoS <sub>2</sub>                            | 155 mV                                          | 86                                     | <i>Small</i><br>2019, 15, 1805511.                          |
| CoB-300                                            | 328 mV                                          | 136.2                                  | <i>Adv. Energy Mater.</i><br>2016, 6, 1502313.              |
| Co <sub>2</sub> B/Co/N-B-C/B <sub>4</sub> C        | 220 mV                                          | 205                                    | <i>ACS Appl. Mater. Interfaces</i><br>2018, 10, 37067-37078 |
| NiCoFeB                                            | 345 mV                                          | 98                                     | <i>Small</i> 2019, 15, 1804212                              |
| NiCoB                                              | 363 mV                                          | 102                                    | <i>Small</i> 2019, 15, 1804212                              |
| CoB@MoS <sub>2</sub> -0.5-300                      | 146 mV                                          | 80.9                                   | <b>This work</b>                                            |
